# Supplementary material for: Circulating microRNAs in Pancreatic Juice as Candidate Biomarkers of Pancreatic Cancer
Source: PubMed Central journal article supplement — J Cancer. 2014 Sep 16;5(8):696–705. doi: 10.7150/jca.10094 (PMC4174514; doi:10.7150/jca.10094), 2014-09-16
Supplement: jcav05p0696s1.pdf [file jcav05p0696s1.pdf]

## Supplementary Information

# Circulating microRNAs in Pancreatic Juice as Candidate Biomarkers of Pancreatic Cancer

Jin Wang<sup>1\*</sup>, Massimo Raimondo<sup>2\*</sup>, Sushovan Guha<sup>3\*</sup>, Jinyun Chen<sup>4</sup>, Lixia Diao<sup>5</sup>, Xiaoqun Dong<sup>6</sup>, Michael B. Wallace<sup>2</sup>, Ann M. Killary<sup>1,7</sup>, Marsha L. Frazier<sup>4,7</sup>, Timothy A. Woodward<sup>2</sup>, Jing Wang<sup>5</sup>, and Subrata Sen<sup>1,7#</sup>

<sup>1</sup>Department of Translational Molecular Pathology, The University of Texas MD Anderson Cancer Center, Houston, Texas; <sup>2</sup>Division of Gastroenterology and Hepatology, Mayo Clinic, Jacksonville, Florida; and <sup>3</sup>Division of Gastroenterology, Hepatology, and Nutrition, The University of Texas Medical School and Health Science Center at Houston, Texas; <sup>4</sup>Epidemiology, <sup>5</sup>Bioinformatics and Computational Biology, UT MD Anderson Cancer Center, Houston Texas; <sup>6</sup>Department of Biomedical and Pharmaceutical Sciences, College of Pharmacy, The University of Rhode Island, Kingston, Rhode Island; <sup>7</sup>Program in Human and Molecular Genetics, The University of Texas Graduate school of Biomedical Sciences, Houston, Texas.

**Supplementary Table S1:** Pancreatic juice microRNA (miRNA) expression profiles in patients with pancreatic ductal adenocarcinoma (PDAC).

| miRNA           | <i>P</i> value | Fold change | miRNA expression in cancer <sup>a</sup>                                                                                                                                                                                     | miRNA expression in PDAC |
|-----------------|----------------|-------------|-----------------------------------------------------------------------------------------------------------------------------------------------------------------------------------------------------------------------------|--------------------------|
| hsa-miR-492     | .013           | 3.29        | Metastatic hepatoblastoma↑                                                                                                                                                                                                  | -                        |
| hsa-miR-1247    | .000           | 3.28        | -                                                                                                                                                                                                                           | -                        |
| hsa-miR-34a     | .015           | 3.27        | Ovarian cancer↓, diffuse large B-cell lymphoma↓, non-small cell lung cancer↓, small-cell lung carcinoma↓, kidney cancer↓, bladder cancer↓, breast cancer↓, retinoblastoma↓, gastric cancer↑, prostate cancer↓, oral cancer↓ | Downregulated            |
| hsa-miR-200a*   | .004           | 3.10        |                                                                                                                                                                                                                             |                          |
| hsa-miR-617     | .024           | 2.96        | -                                                                                                                                                                                                                           | -                        |
| hsa-miR-519e*   | .005           | 2.89        | -                                                                                                                                                                                                                           | -                        |
| hsa-miR-1228*   | .035           | 2.87        | -                                                                                                                                                                                                                           | -                        |
| hsa-miR-516a-5p | .041           | 2.87        | -                                                                                                                                                                                                                           | -                        |

|                |      |      |                                                                                                                                                                                                                                                              |             |
|----------------|------|------|--------------------------------------------------------------------------------------------------------------------------------------------------------------------------------------------------------------------------------------------------------------|-------------|
| hsa-miR-210    | .017 | 2.84 | Lung squamous cell carcinoma (SCC)↑, adrenocortical carcinoma↑, clear cell renal cell carcinoma (ccRCC)↑, breast cancer↑, prostate cancer↑, oral carcinoma↑, lung cancer↑, ovarian carcinoma↑, head and neck cancer↑, oligodendroglioma↑, gastric carcinoma↓ | Upregulated |
| hsa-miR-711    | .002 | 2.83 | Cutaneous T-cell lymphoma↑                                                                                                                                                                                                                                   | -           |
| hsa-miR-670    | .031 | 2.79 | -                                                                                                                                                                                                                                                            | -           |
| hsa-miR-206    | .003 | 2.79 | Estrogen receptor (ER) $\alpha$ -positive endometrial endometrioid adenocarcinoma↓, ER $\alpha$ -positive breast cancer↓, ccRCC↓, lung cancer↑, rhabdomyosarcoma↑                                                                                            | -           |
| hsa-miR-382    | .018 | 2.70 | -                                                                                                                                                                                                                                                            | -           |
| hsa-miR-542-5p | .030 | 2.68 | Osteosarcoma↑, neuroblastoma↓, endometrial carcinosarcoma↑,                                                                                                                                                                                                  | -           |
| hsa-miR-495    | .030 | 2.67 | Breast cancer↑, KRAS-positive adenocarcinoma of the lung↑                                                                                                                                                                                                    | -           |
| hsa-miR-605    | .026 | 2.63 | miR-605 AG/GG genotype carriers in colorectal cancer and gastric cancer: at least 1 G allele of miR-605 associated with increased risk of lung cancer                                                                                                        | -           |
| hsa-miR-525-5p | .033 | 2.60 | -                                                                                                                                                                                                                                                            | -           |
| hsa-miR-648    | .024 | 2.53 | -                                                                                                                                                                                                                                                            | -           |
| hsa-miR-365    | .006 | 2.50 | Breast cancer↑                                                                                                                                                                                                                                               | -           |
| hsa-miR-493    | .003 | 2.37 | -                                                                                                                                                                                                                                                            | -           |
| hsa-miR-1469   | .033 | 2.31 | -                                                                                                                                                                                                                                                            | -           |
| hsa-miR-331-3p | .037 | 2.25 | Prostate cancer↓, lung cancer↑, gastric cancer↓                                                                                                                                                                                                              | -           |
| hsa-miR-1303   | .004 | 2.25 | -                                                                                                                                                                                                                                                            | -           |
| hsa-miR-432    | .013 | 2.23 | -                                                                                                                                                                                                                                                            | -           |
| hsa-miR-129-5p | .014 | 2.22 | -                                                                                                                                                                                                                                                            | -           |
| hsa-miR-30b*   | .020 | 2.21 | -                                                                                                                                                                                                                                                            | -           |
| hsa-miR-1208   | .022 | 2.19 | -                                                                                                                                                                                                                                                            | -           |
| hsa-miR-1972   | .041 | 2.19 | -                                                                                                                                                                                                                                                            | -           |
| hsa-miR-708    | .003 | 2.14 | Renal cancer↓, bladder urothelial carcinoma↑, lung cancer↑                                                                                                                                                                                                   | -           |
| hsa-miR-1276   | .048 | 2.14 | -                                                                                                                                                                                                                                                            | -           |
| hsa-miR-373    | .020 | 2.12 | Breast cancer↑, colon cancer↓, hepatocellular                                                                                                                                                                                                                | -           |

|                 |      |       |                                                                                                                                                                                        |             |
|-----------------|------|-------|----------------------------------------------------------------------------------------------------------------------------------------------------------------------------------------|-------------|
|                 |      |       | carcinoma↑, hilar cholangiocarcinoma↓,<br>esophageal cancer↑, prostate cancer↓, testicular<br>germ cell tumor↑                                                                         |             |
| hsa-miR-133b    | .008 | 2.11  | Colorectal cancer↓, esophageal (SCC)↓, tongue<br>SCC↓, head and neck cancer↓, lung cancer↓,<br>bladder cancer↓, gastric cancer↓                                                        | -           |
| hsa-miR-365*    | .012 | 2.10  | -                                                                                                                                                                                      | -           |
| hsa-miR-205     | .013 | 2.09  | Prostate cancer↓, lung cancer↑, melanoma↓,<br>esophageal SCC↑, renal cancer↓, breast cancer↓,<br>bladder cancer↑, head and neck SCC↑,<br>endometrioid adenocarcinoma↑, ovarian cancer↑ | Upregulated |
| hsa-miR-193a-5p | .021 | 2.09  | -                                                                                                                                                                                      | -           |
| hsa-miR-133a    | .040 | 1.98  | Renal cancer↓, esophageal SCC↓,<br>rhabdomyosarcoma↓, bladder cancer↓, squamous<br>cell carcinoma of the tongue↓                                                                       | -           |
| hsa-miR-665     | .044 | 1.89  | -                                                                                                                                                                                      | -           |
| hsa-miR-611     | .001 | 1.88  | -                                                                                                                                                                                      | -           |
| hsa-miR-634     | .016 | 1.86  | -                                                                                                                                                                                      | -           |
| hsa-miR-516b    | .016 | 1.86  | -                                                                                                                                                                                      | -           |
| hsa-miR-373*    | .008 | 1.85  | B-cell precursor acute lymphoblastic leukemia↓                                                                                                                                         | -           |
| hsa-miR-551b*   | .024 | 1.82  | -                                                                                                                                                                                      | -           |
| hsa-miR-1224-5p | .031 | 1.76  | Lung cancer↓                                                                                                                                                                           | -           |
| hsa-miR-486-5p  | .025 | 1.74  | Lung SCC↓, lung cancer ↓, testicular cancer↓,<br>colon cancer↓, liver cancer↓, ovarian cancer↓,<br>breast cancer↓, prostate cancer↓, lymphoma↓                                         | -           |
| hsa-miR-526b    | .028 | 1.56  | -                                                                                                                                                                                      | -           |
| hsa-miR-548q    | .012 | 1.54  | -                                                                                                                                                                                      | -           |
| hsa-miR-769-3p  | .046 | 1.54  | -                                                                                                                                                                                      | -           |
| hsa-miR-1183    | .020 | 1.51  | -                                                                                                                                                                                      | -           |
| hsa-miR-601     | .021 | -2.46 | Gastric cancer↑                                                                                                                                                                        | -           |

<sup>a</sup>↑ indicates upregulation; ↓, downregulation.

**Supplementary Table S2:** Mean fold change of pancreatic juice miRNA levels in PDAC, chronic pancreatitis (CP) and non-healthy controls (NPNH).

| miRNA    | N/CP/PC | <sup>a</sup> Mean fold change $\pm$<br><sup>b</sup> SEM | P value |         |           |
|----------|---------|---------------------------------------------------------|---------|---------|-----------|
|          |         |                                                         | CP/NPNH | PDAC/CP | PDAC/NPNH |
| miR-205  | NPNH    | 3.27 $\pm$ 2.50                                         |         |         |           |
|          | CP      | 190.20 $\pm$ 105.46                                     | .093    | .449    | .009      |
|          | PDAC    | 104.03 $\pm$ 36.95                                      |         |         |           |
| miR-210  | NPNH    | 1.97 $\pm$ 2.12                                         |         |         |           |
|          | CP      | 574.02 $\pm$ 273.37                                     | .051    | .969    | .010      |
|          | PDAC    | 587.91 $\pm$ 219.44                                     |         |         |           |
| miR-492  | NPNH    | 0.494 $\pm$ 2.37                                        |         |         |           |
|          | CP      | 15.79 $\pm$ 5.75                                        | .022    | .179    | .003      |
|          | PDAC    | 30.94 $\pm$ 9.54                                        |         |         |           |
| miR-1247 | NPNH    | -1.22 $\pm$ 1.73                                        |         |         |           |
|          | CP      | 3.22 $\pm$ 1.66                                         | .073    | .628    | .041      |
|          | PDAC    | 4.54 $\pm$ 2.15                                         |         |         |           |

<sup>a</sup>Mean fold change: the average of fold change for each group.

<sup>b</sup>SEM: standard error of the mean.

**Supplementary Table S3:** Sensitivity, specificity and area under the curve (AUC) for pancreatic juice microRNAs (miRNAs), *CA19-9* and combinations of miRNAs and *CA19-9*.

| <b>miRNA/protein</b>          | <b>Sensitivity, %</b> | <b>Specificity, %</b> | <b>AUC</b> | <b>95% CI</b> |
|-------------------------------|-----------------------|-----------------------|------------|---------------|
| miR-205                       | 64                    | 74                    | 0.68       | 0.53-0.83     |
| miR-210                       | 76                    | 95                    | 0.84       | 0.75-0.94     |
| miR-492                       | 73                    | 82                    | 0.80       | 0.68-0.92     |
| miR-1247                      | 53                    | 88                    | 0.63       | 0.50-0.77     |
| <i>CA19-9</i>                 | 77                    | 93                    | 0.89       | 0.82-0.97     |
| 4-miRNA panel                 | 87                    | 88                    | 0.92       | 0.84-0.99     |
| 4-miRNA panel + <i>CA19-9</i> | 91                    | 100                   | 0.99       | 0.94-1.00     |

CI, confidence interval.

**Supplementary Table S4:** Relationship of pancreatic juice miR-210 and miR-205 levels with lymph node involvement and tumor differentiation.

| MicroRNA expression |      | Tumor differentiation <sup>a</sup> |                                   | No. of lymph nodes involved |              | p value |
|---------------------|------|------------------------------------|-----------------------------------|-----------------------------|--------------|---------|
|                     |      | Good to moderate,<br>No. (%)       | Poor or not available,<br>No. (%) | 0<br>No. (%)                | 1<br>No. (%) |         |
| miR-205             | Low  | 8 (88.89)                          | 12 (30.00)                        |                             |              | .001    |
|                     | High | 1 (11.11)                          | 28 (70.00)                        |                             |              |         |
| miR-210             | Low  |                                    |                                   | 40 (54.79)                  | 2 (15.38)    | .009    |
|                     | High |                                    |                                   | 33 (45.21)                  | 11 (84.62)   |         |
| miR-205/miR-210     | 0    |                                    |                                   | 28 (38.36)                  | 1 (7.69)     | .045    |
|                     | 1    |                                    |                                   | 23 (31.51)                  | 4 (30.77)    |         |
|                     | 2    |                                    |                                   | 22 (30.14)                  | 8 (61.54)    |         |
